# Supplementary material for: Bimetallic aluminum complexes bearing novel spiro-phenanthrene-monoketone/OH derivatives: synthesis, characterization and the ring-opening polymerization of ε-caprolactone
Source: Royal Society of Chemistry journal article supplement (doi:10.1039/d1ra01288f), 2021-01-01
Supplement: d1ra01288f1.pdf [file d1ra01288f1.pdf]

## **Bimetallic Aluminum complexes bearing the novel spiro-phenanthrene-monoketone/OH derivatives: synthesis, characterization and the ring-opening polymerization of $\epsilon$ -caprolactone**

Erlin Yue,<sup>a</sup> Furong Cao,<sup>b</sup> Jun Zhang,<sup>c</sup> Wenjuan Zhang,<sup>\* b</sup> Youshu Jiang,<sup>c</sup> Tongling Liang<sup>c</sup> and Wen-Hua Sun<sup>\*c</sup>

<sup>a</sup> Yan'an Key Laboratory of New Energy & New Functional Materials, Shaanxi Key Laboratory of Chemical Reaction Engineering, School of Chemistry and Chemical Engineering, Yan'an University, Yan'an 716000, China. E-mail: yueerlin@yau.edu.cn

<sup>b</sup> Beijing Key Laboratory of Clothing Materials R&D and Assessment, Beijing Engineering Research Center of Textile Nanofiber, School of Materials Science and Engineering, Beijing Institute of Fashion Technology, Beijing 100029, China. E-mail: zhangwj@bift.edu.cn

<sup>c</sup> Key Laboratory of Engineering Plastics and Beijing National Laboratory for Molecular Sciences, Institute of Chemistry, Chinese Academy of Sciences, Beijing 100190, China. E-mail: whsun@iccas.ac.cn

### **Contents**

**FS1-FS10** <sup>1</sup>H and <sup>13</sup>C NMR spectra of complexes **AI1-AI5**

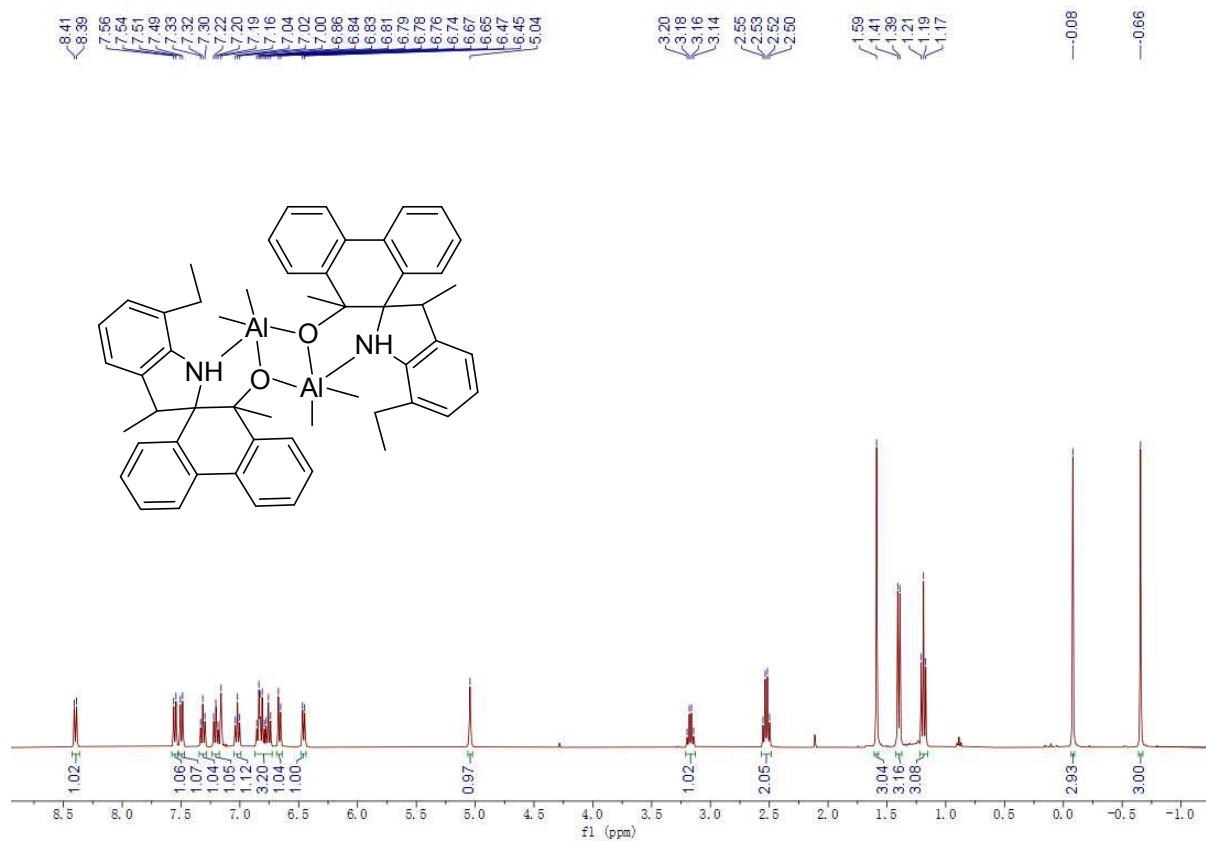

Figure S1  $^1\text{H}$  NMR spectrum of complex Al1 (400 MHz,  $\text{C}_6\text{D}_6$ ,  $25^\circ\text{C}$ )

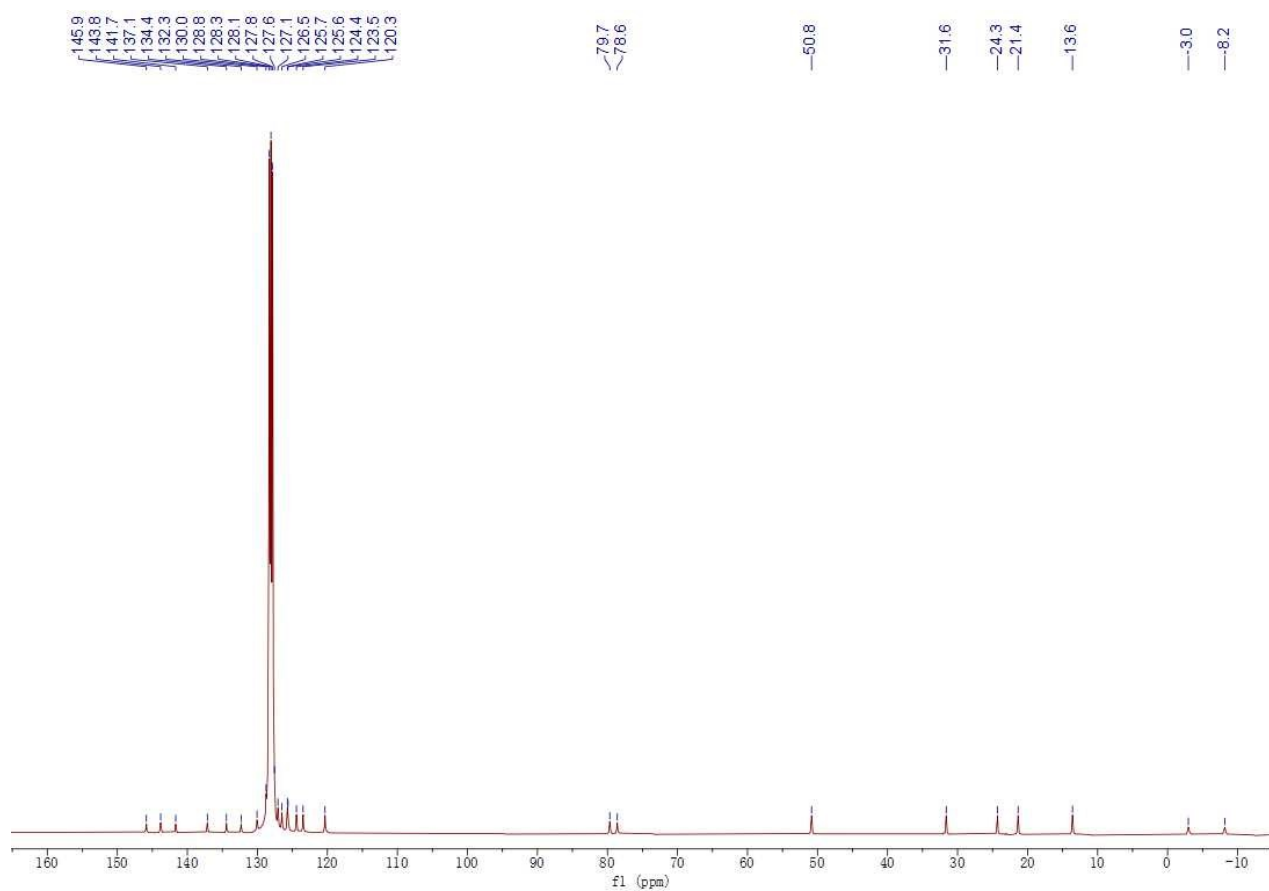

Figure S2  $^{13}\text{C}$  NMR spectrum of complex Al1 (100 MHz,  $\text{C}_6\text{D}_6$ ,  $25^\circ\text{C}$ )

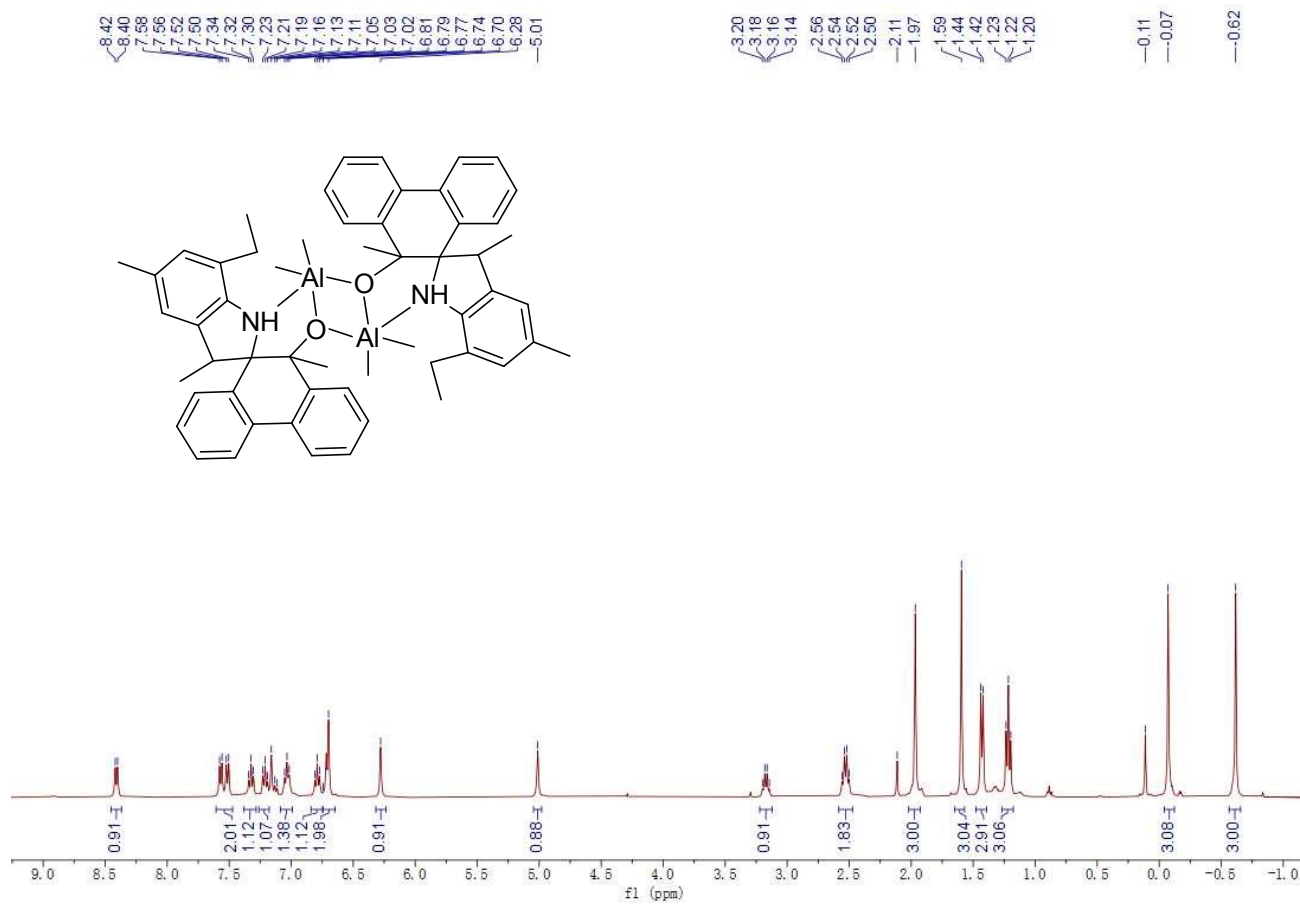

Figure S3  $^1\text{H}$  NMR spectrum of complex Al2 (400 MHz,  $\text{C}_6\text{D}_6$ , 25°C)

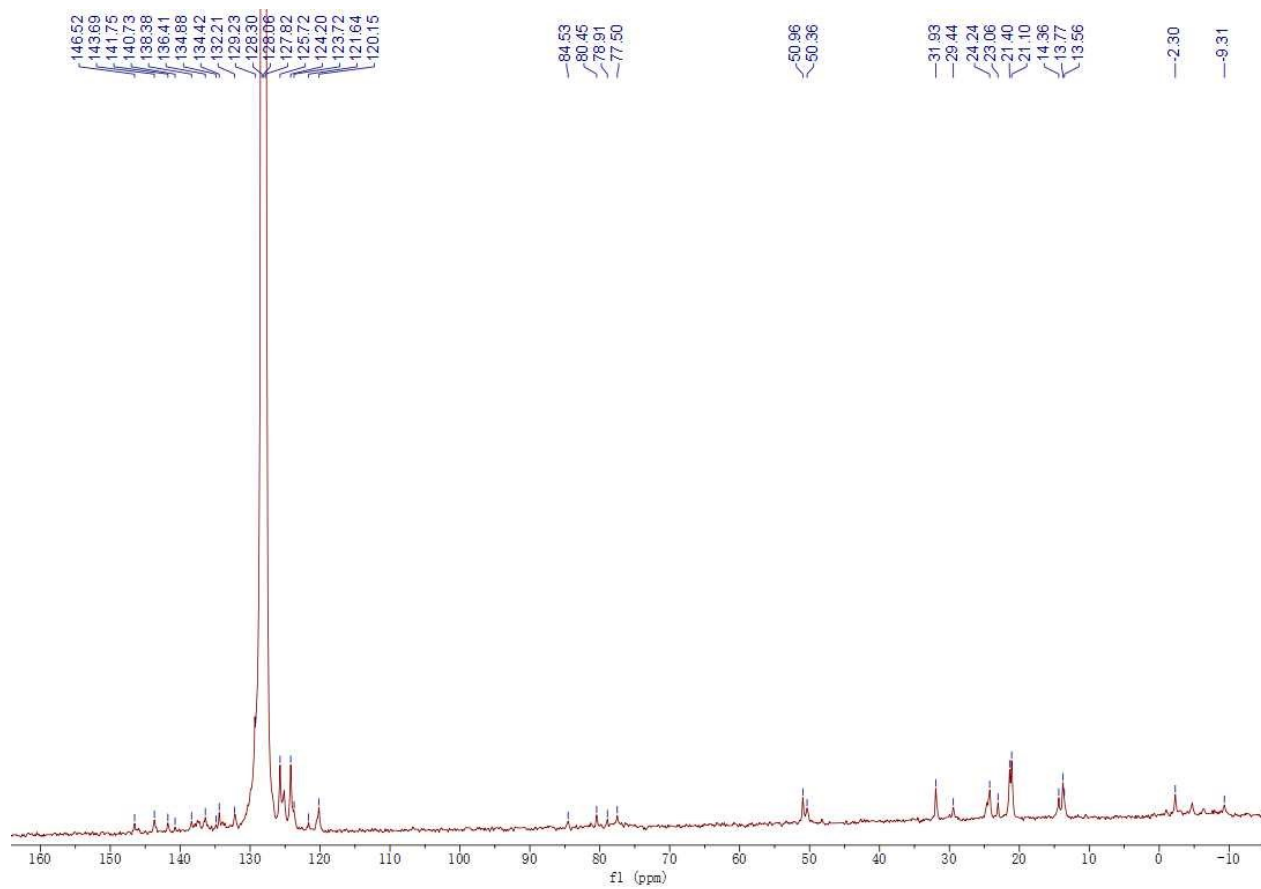

Figure S4  $^{13}\text{C}$  NMR spectrum of complex Al2 (100 MHz,  $\text{C}_6\text{D}_6$ , 25°C)

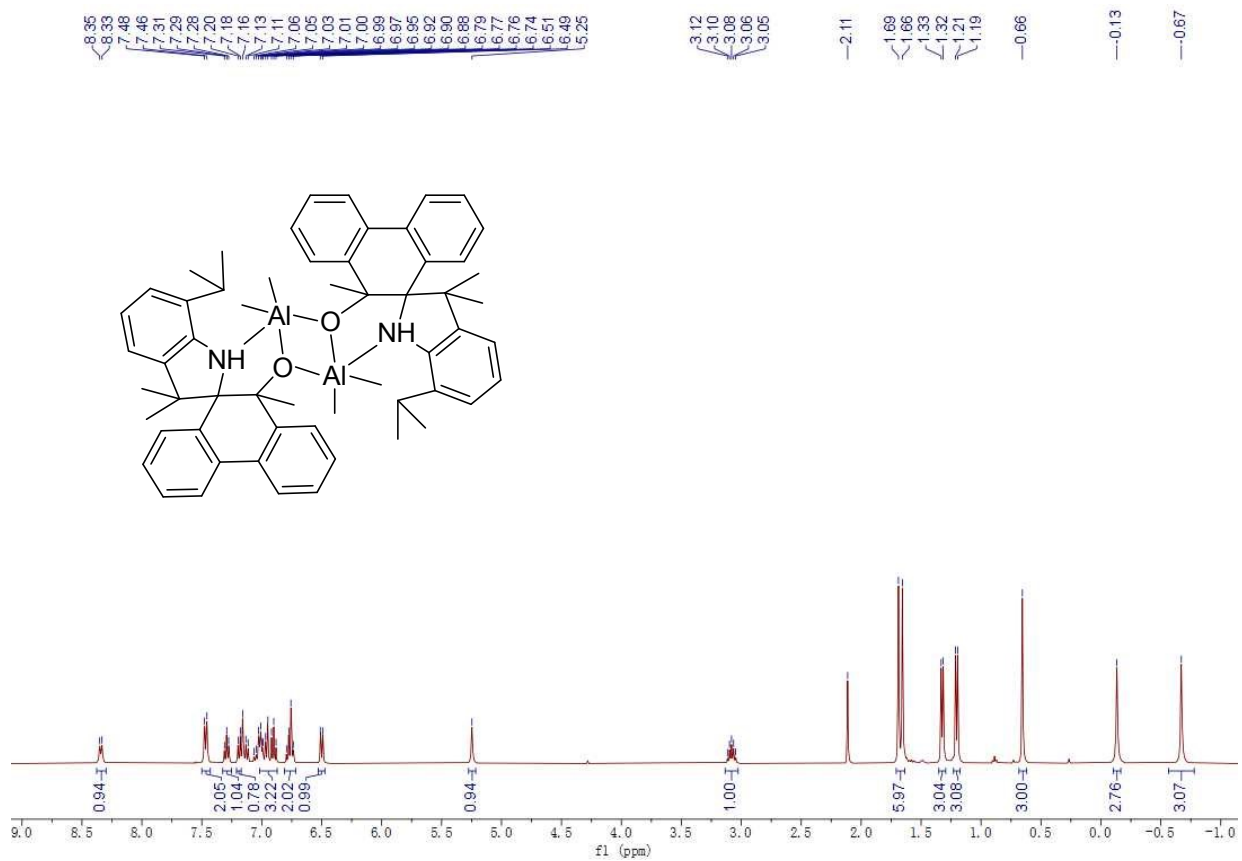

Figure S5  $^1\text{H}$  NMR spectrum of complex Al3 (400 MHz,  $\text{C}_6\text{D}_6$ , 25°C)

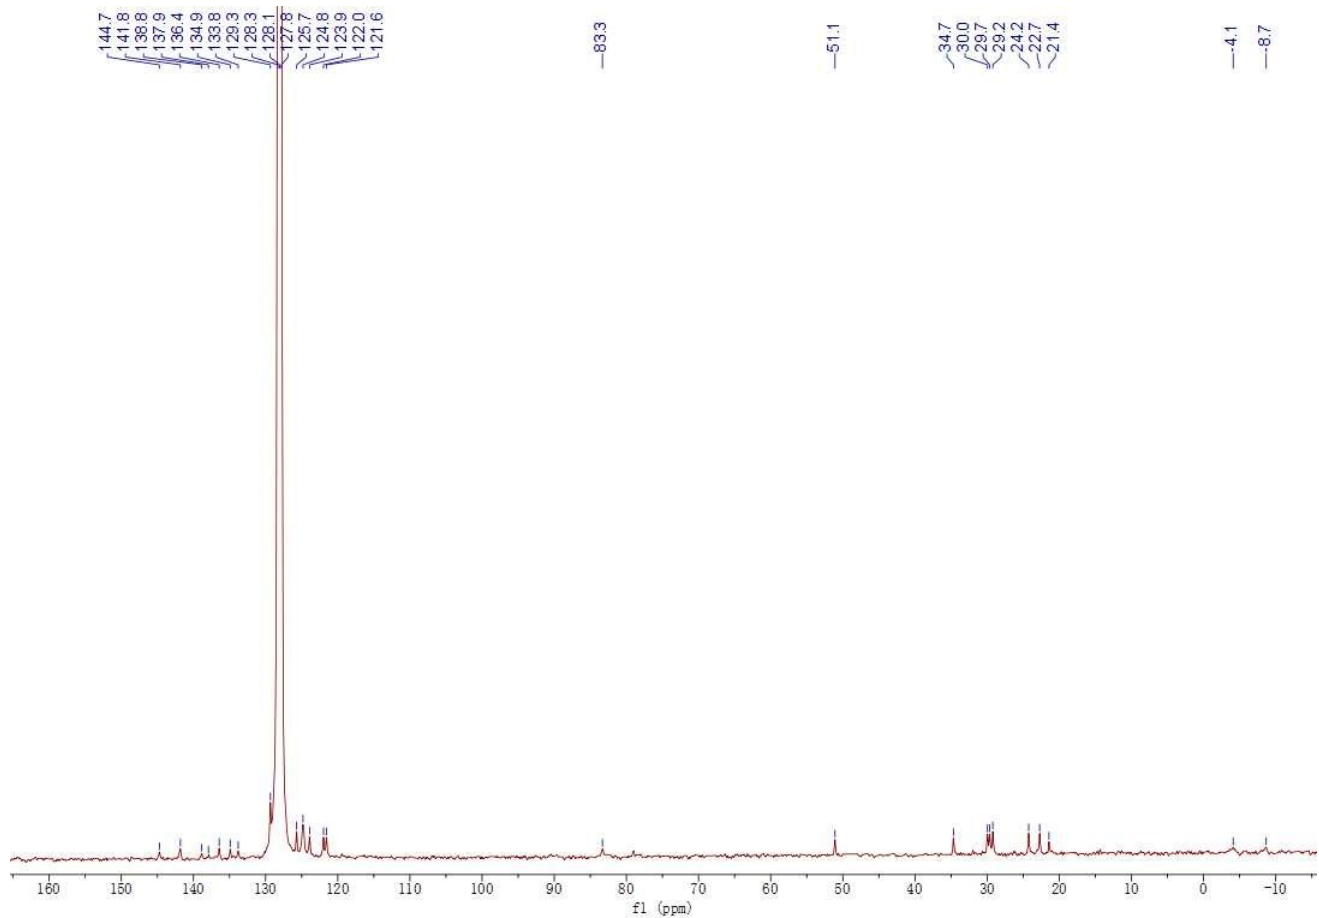

Figure S6  $^{13}\text{C}$  NMR spectrum of complex Al3 (100 MHz,  $\text{C}_6\text{D}_6$ , 25°C)

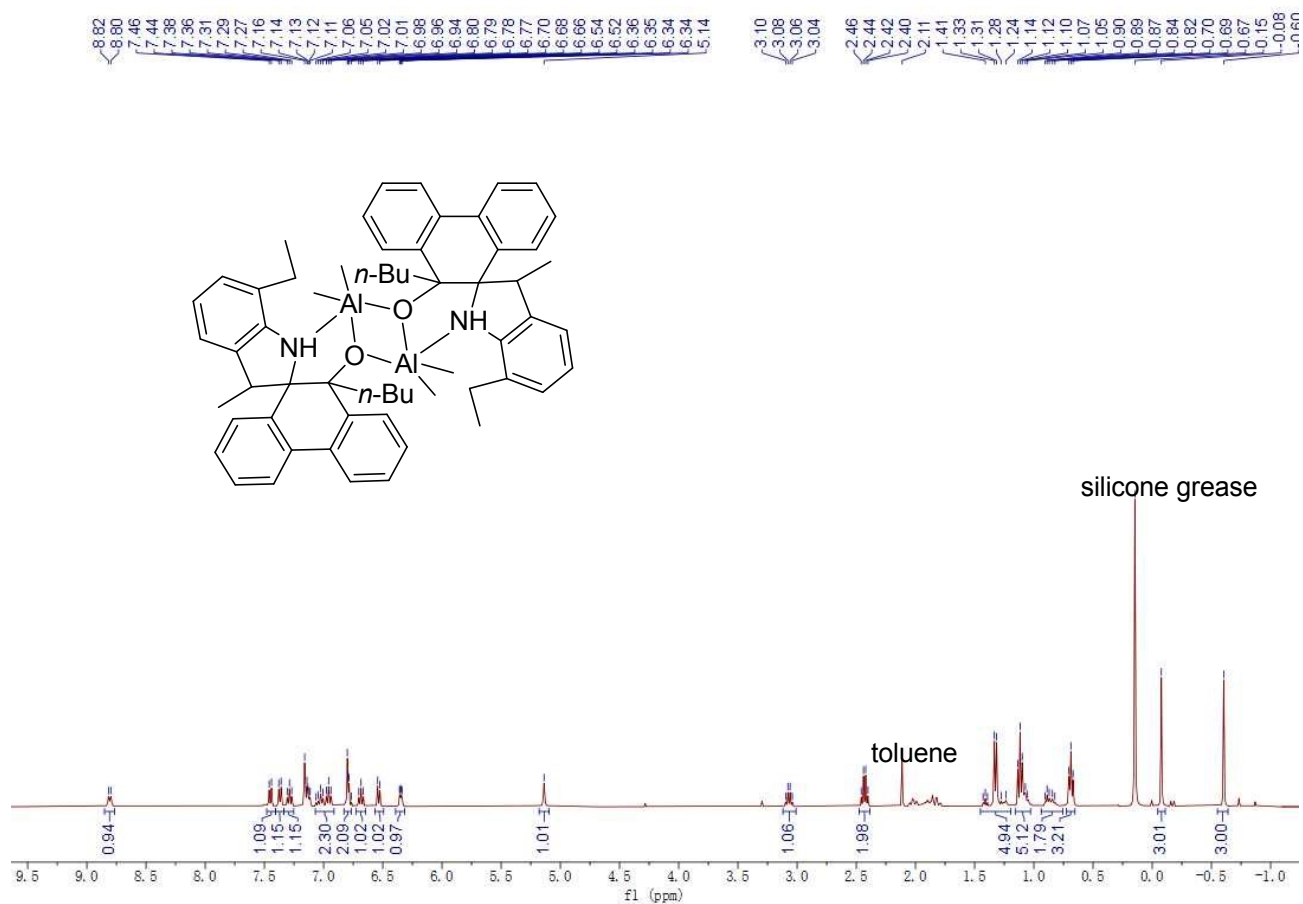

**Figure S7**  $^1\text{H}$  NMR spectrum of complex Al4 (400 MHz,  $\text{C}_6\text{D}_6$ , 25°C)

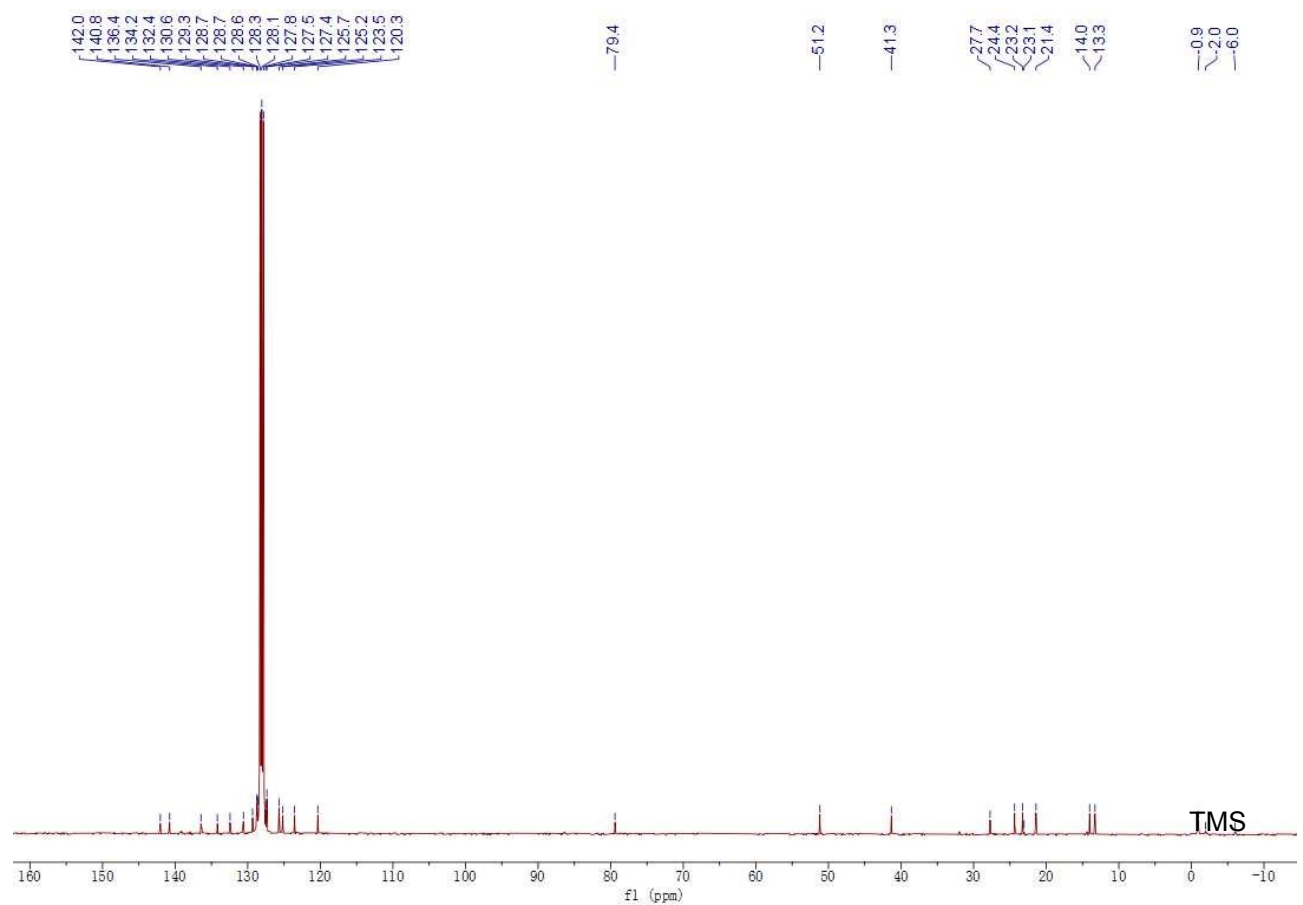

**Figure S8**  $^{13}\text{C}$  NMR spectrum of complex Al4 (100 MHz,  $\text{C}_6\text{D}_6$ , 25°C)

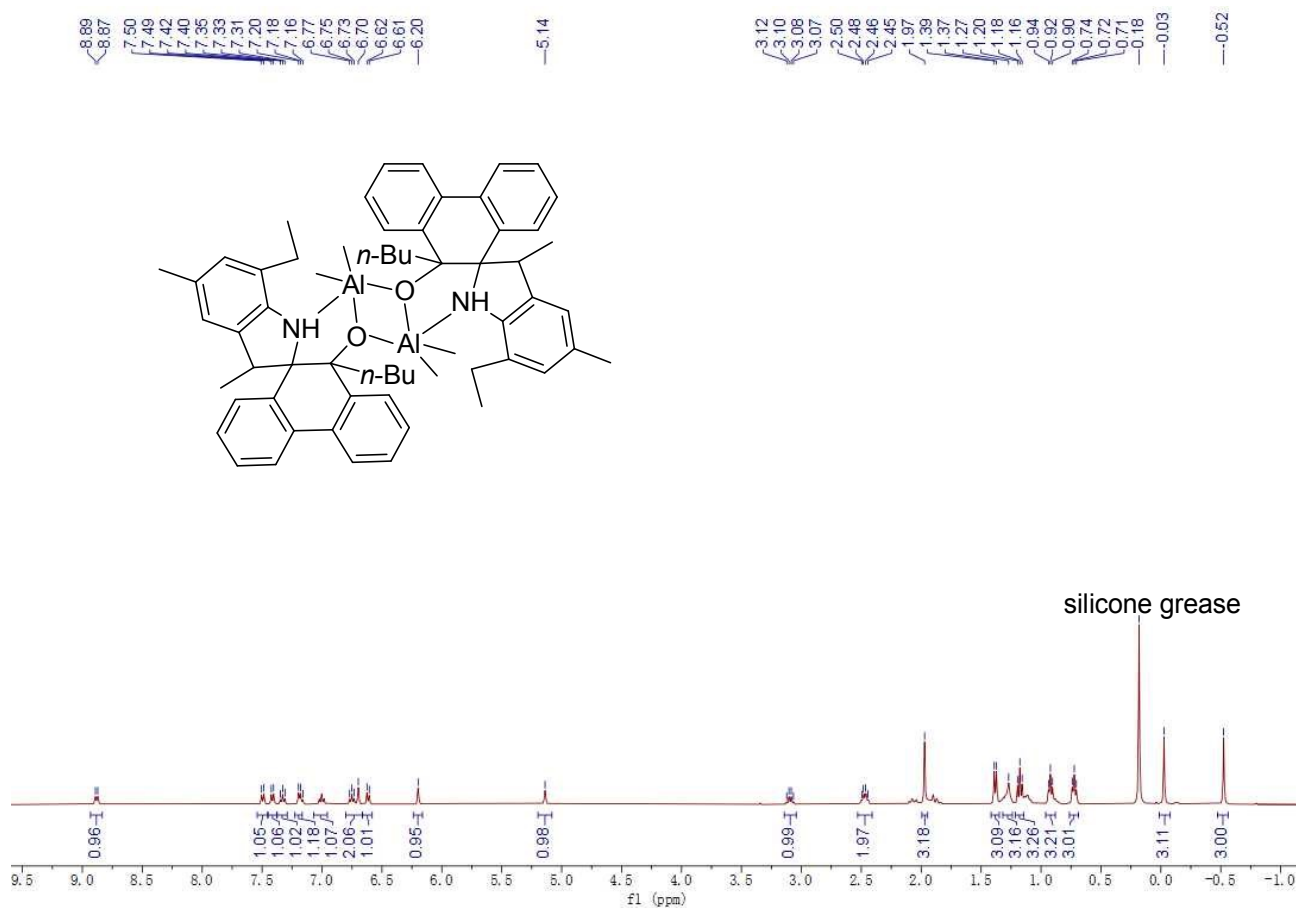

Figure S9  $^1\text{H}$  NMR spectrum of complex AI5 (400 MHz,  $\text{C}_6\text{D}_6$ , 25°C)

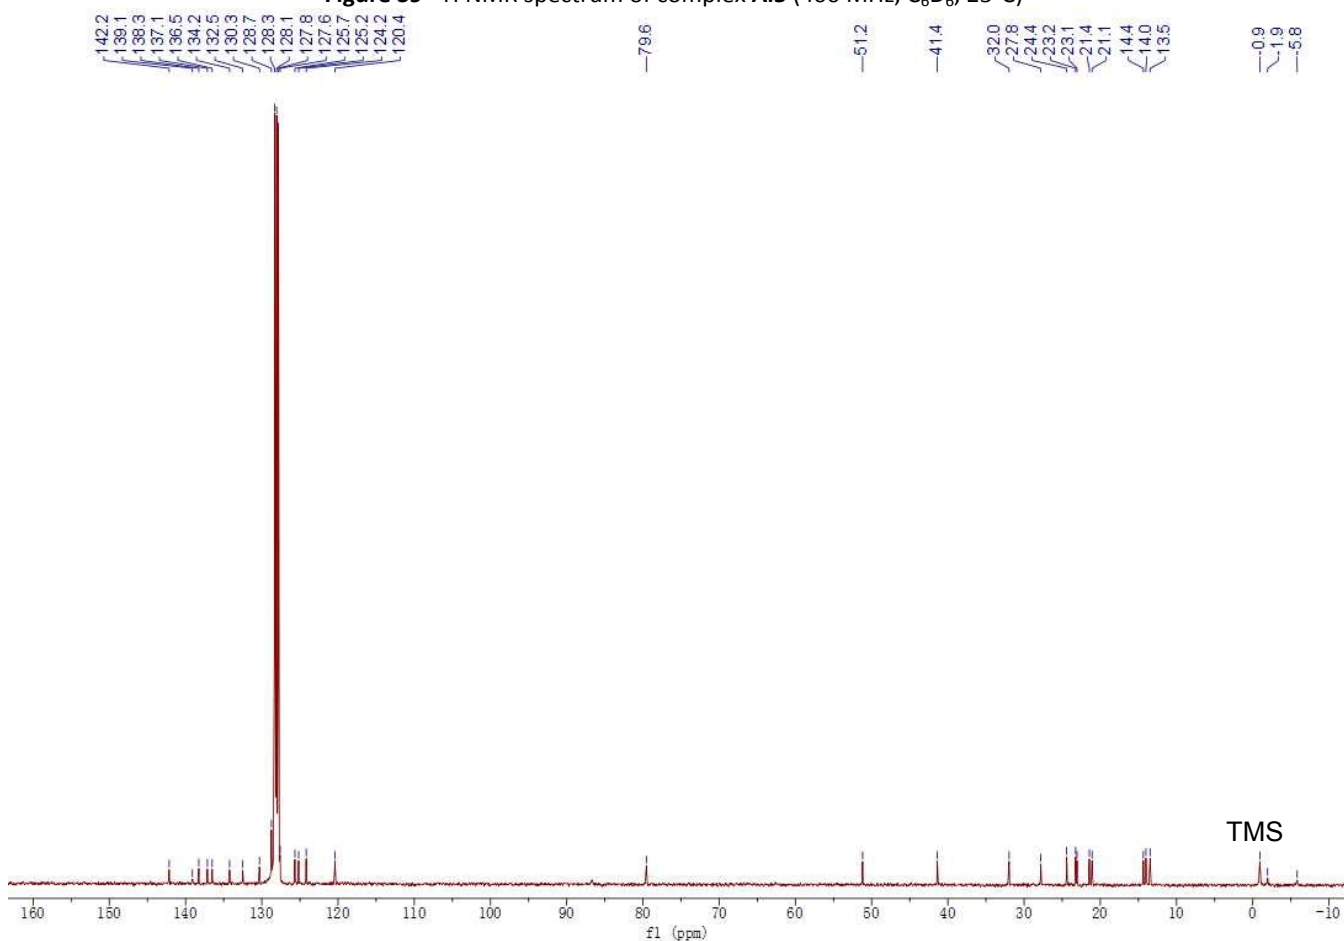

Figure S10  $^{13}\text{C}$  NMR spectrum of complex AI5 (100 MHz,  $\text{C}_6\text{D}_6$ , 25°C)
